# Supplementary material for: A volcano curve: optimizing methanol electro-oxidation on Pt-decorated Ru nanoparticles
Source: Royal Society of Chemistry journal article supplement (doi:10.1039/b816531a), 2009-01-01
Supplement: b816531a.pdf [file b816531a.pdf]

## Supporting Information

### **A Volcano Curve: Optimizing Methanol Electro-oxidation on Pt-decorated Ru Nanoparticles**

Bingchen Du<sup>a</sup>, Savelas A. Rabb<sup>b</sup>, Christopher Zangmeister<sup>b</sup>, and YuYe Tong<sup>\*a</sup>

<sup>a</sup> *Department of Chemistry, Georgetown University, 37<sup>th</sup> & O Streets, NW, Washington DC, 20057, USA. \*E-mail: [yyt@georgetown.edu](mailto:yyt@georgetown.edu)*

<sup>b</sup> *Chemical Science and Technology Lab, National Institute of Standards and Technology, 100 Bureau Drive, Gaithersburg, MD, 20899, USA*

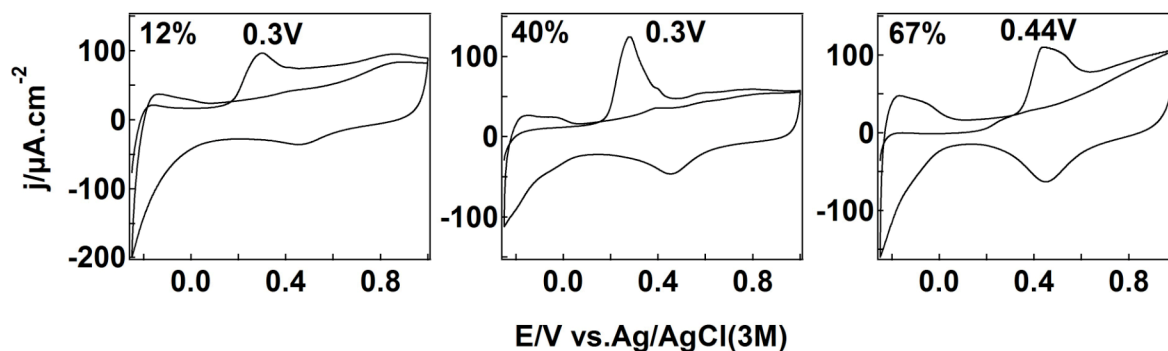

Fig. S1. The CO stripping CVs of the three samples of the second batch.

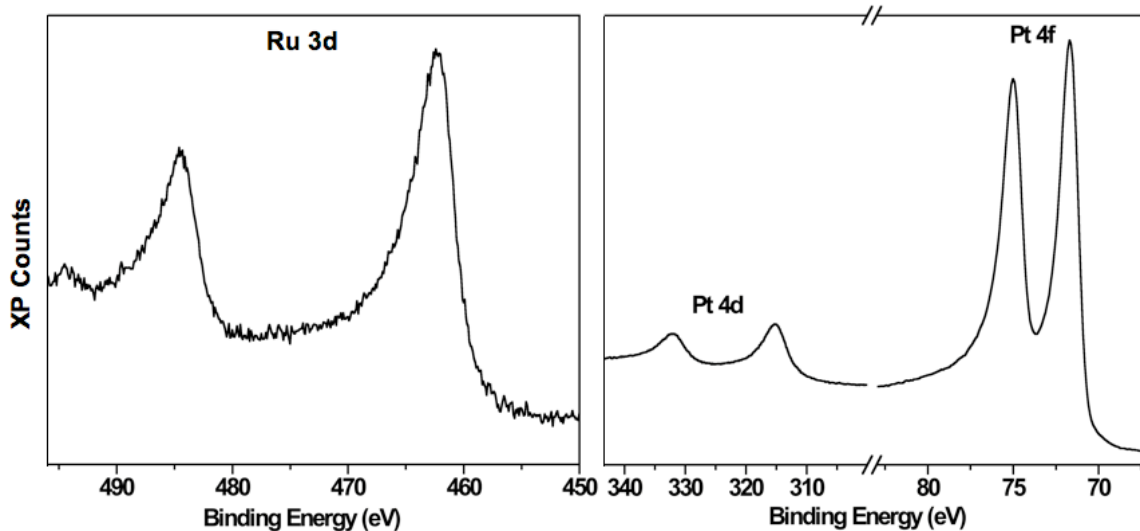

Fig. S2. The Ru (3d) and Pt(4d, 4f) XP spectra of Pt(40)-Ru of the second batch.

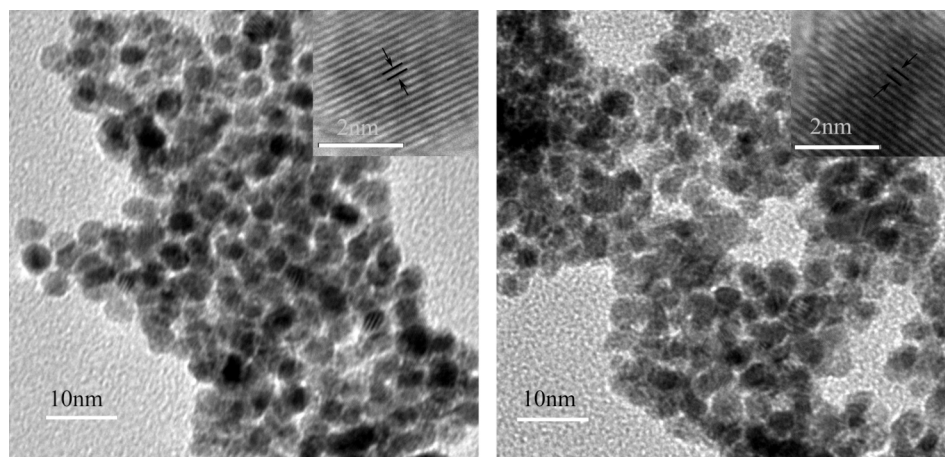

Fig. S3. The respective TEM images of Pt(12)-Ru(Left) and Pt(40)-Ru(Right). The insets are the corresponding HRTEMs where the distance between two adjacent atomic layers is 0.21 nm.

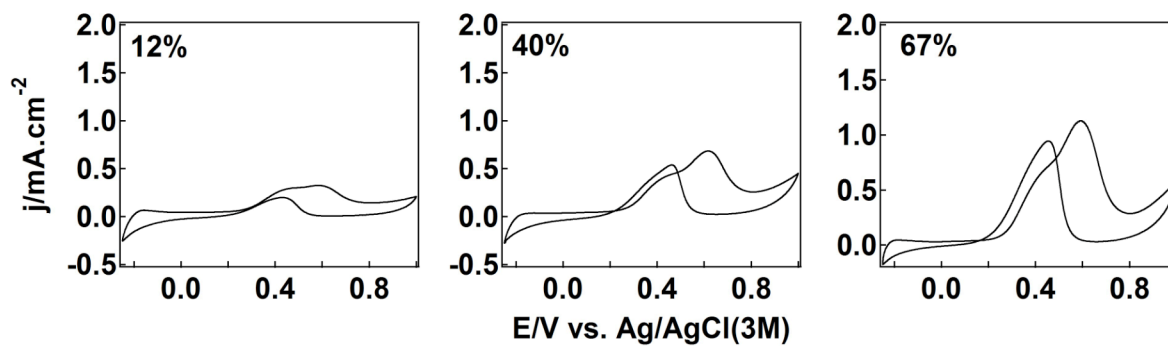

Fig. S4. The MeOH electro-oxidation CVs of the 3 2<sup>nd</sup>-Batch samples

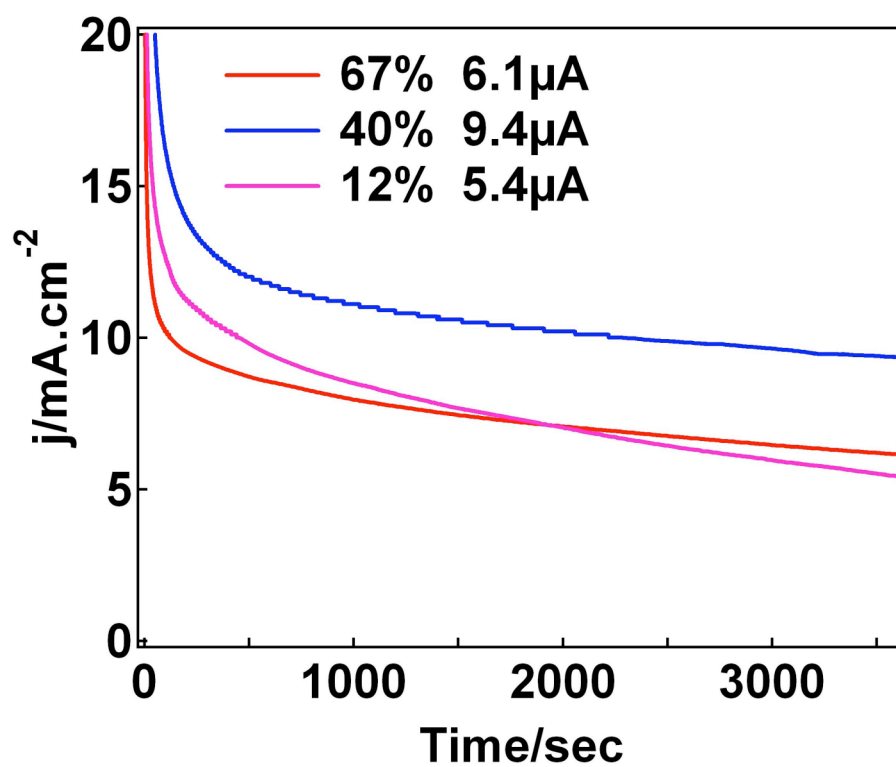

Fig. S5. The CA of MeOH electro-oxidation of the 3 2<sup>nd</sup>-Batch samples with the current values at 60 min.
